# Supplementary material for: Facile synthesis of Ag lattice doped mesoporous In2O3 nanocubes for high performance ethanol sensing
Source: Royal Society of Chemistry journal article supplement (doi:10.1039/d3an01730c), 2023-11-15
Supplement: d3an01730c1.pdf [file d3an01730c1.pdf]

## Supporting Information

### A Facial Synthesis of Ag Lattice Doped Mesoporous $\text{In}_2\text{O}_3$ Nanocubes for High Performance Ethanol Sensing

Xinyu Liu,<sup>a</sup> Cuiping Jia,<sup>b,\*</sup> Xin Liu,<sup>a</sup> Jiabing Luo,<sup>a</sup> Yan Zhou,<sup>a</sup> Wenle Li,<sup>a</sup> Shutao Wang<sup>c</sup>, Jun Zhang<sup>a,\*</sup>

<sup>a</sup>School of Materials Science and Engineering, China University of Petroleum, Qingdao 266580, China

<sup>b</sup>College of Science, China University of Petroleum, Qingdao 266580, China

<sup>c</sup>College of Chemistry and Chemical Engineering, China University of Petroleum, Qingdao 266580, China

\*Corresponding address

School of Materials Science and Engineering, China University of Petroleum, QingDao 266580 China.

E-mail: zhangj@upc.edu.cn

College of Science, China University of Petroleum, QingDao 266580 China.

E-mail: jiacuiping@upc.edu.cn

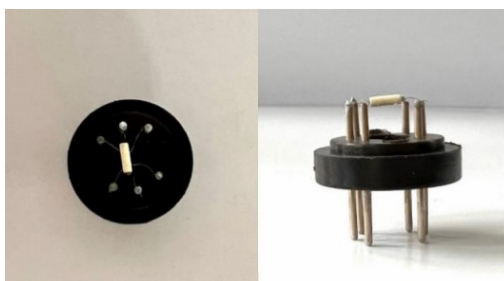

**Fig. S1.** The photo of fabricated  $\text{In}_2\text{O}_3$  gas sensor.

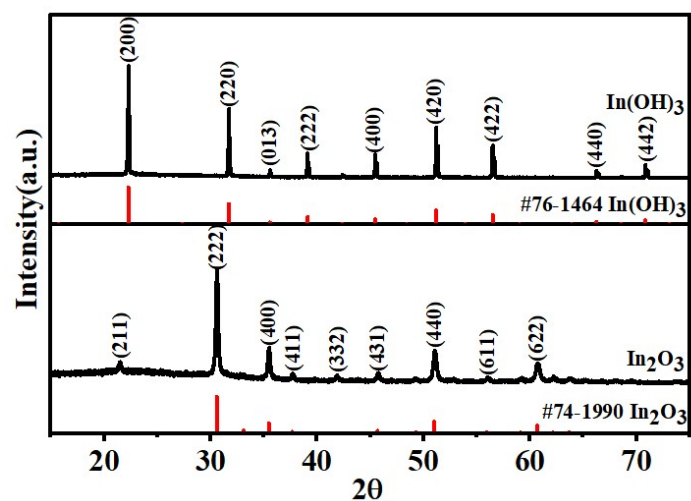

Fig. S2. XRD patterns of  $\text{In}(\text{OH})_3$  and  $\text{In}_2\text{O}_3$ .

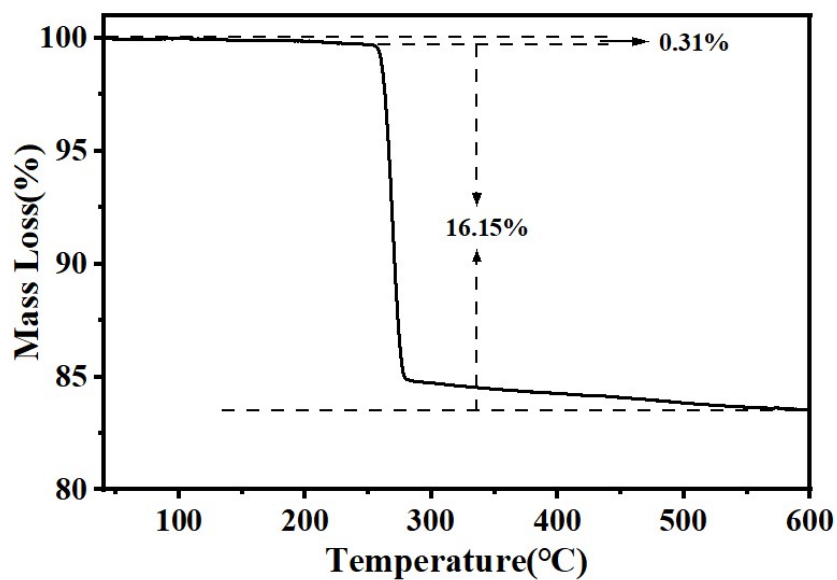

Fig. S3. The TG curves of the  $\text{In}(\text{OH})_3$ .

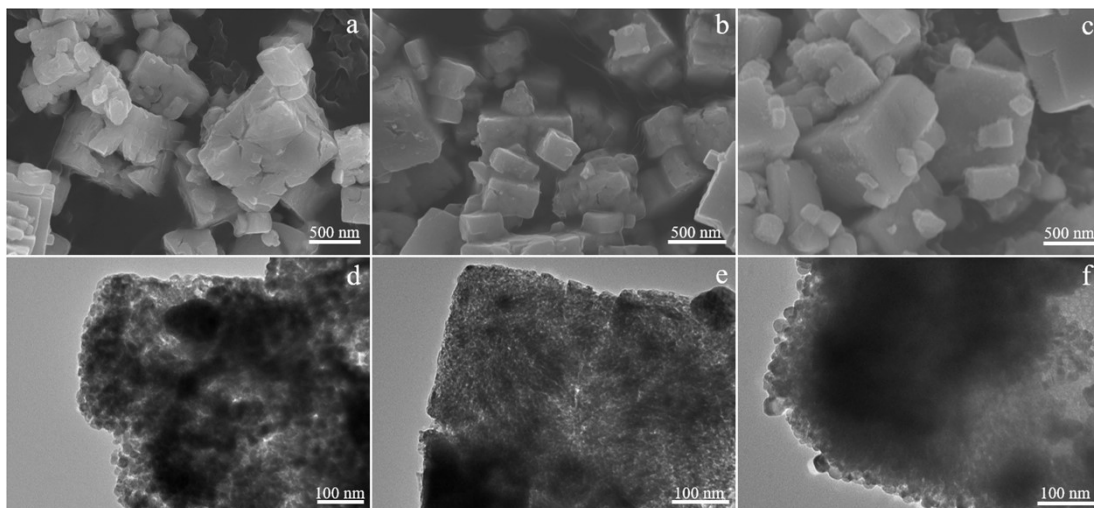

**Fig. S4.** SEM images of (a) 3.0mol% Ag-In<sub>2</sub>O<sub>3</sub>, (b) 5.0mol% Ag-In<sub>2</sub>O<sub>3</sub> and (c) 10.0mol% Ag-In<sub>2</sub>O<sub>3</sub>. TEM images of (d) 3.0mol% Ag-In<sub>2</sub>O<sub>3</sub>, (e) 5.0mol% Ag-In<sub>2</sub>O<sub>3</sub> and (f) 10.0mol% Ag-In<sub>2</sub>O<sub>3</sub>.

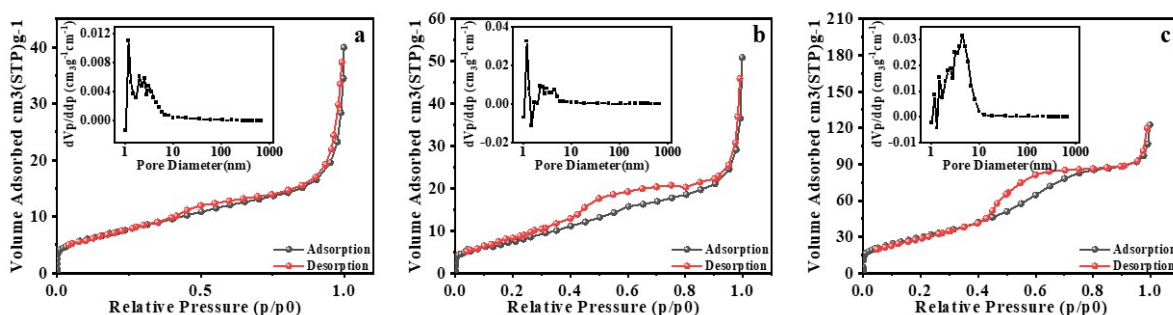

**Fig. S5.** N<sub>2</sub> adsorption-desorption isotherms and pore diameter distribution (inset) curves of (a) 3.0mol% Ag-In<sub>2</sub>O<sub>3</sub>, (b) 5.0mol% Ag-In<sub>2</sub>O<sub>3</sub> and (c) 10.0mol% Ag-In<sub>2</sub>O<sub>3</sub>.

**Table S1.** Summary of sensing properties towards ethanol of reported In<sub>2</sub>O<sub>3</sub>-based materials

| Sensing materials                                                   | ethanol<br>(ppm) | Working temp (°C) | Response | Reference |
|---------------------------------------------------------------------|------------------|-------------------|----------|-----------|
| 6mol% Ho-In <sub>2</sub> O <sub>3</sub>                             | 100              | 240               | 60       | 1         |
| 3% Ag-In <sub>2</sub> O <sub>3</sub>                                | 50               | 300               | 30.06    | 2         |
| 3wt% Eu <sub>2</sub> O <sub>3</sub> -In <sub>2</sub> O <sub>3</sub> | 50               | 260               | 44       | 3         |
| 10mol% Ag-In <sub>2</sub> O <sub>3</sub>                            | 100              | 150               | 102      | 4         |
| 7mol% Ag-In <sub>2</sub> O <sub>3</sub>                             | 100              | 140               | 420      | This work |

## References:

1. H. Duan, Y. Wang, S. Li, H. Li, L. Liu, L. Du and Y. Cheng, Controllable synthesis of Ho-doped  $\text{In}_2\text{O}_3$  porous nanotubes by electrospinning and their application as an ethanol gas sensor, *Journal of Materials Science*, 2017, DOI: 10.1007/s10853-017-1796-9.
2. K. Anand, J. Kaur, R. C. Singh and R. Thangaraj, Preparation and characterization of Ag-doped  $\text{In}_2\text{O}_3$  nanoparticles gas sensor, *Chemical Physics Letters*, 2017, **682**, 140-146.
3. H. Lian, Y. Feng, Z. Wang, L. Liu, X. Guo and X. Wang, Porous  $\text{Eu}_2\text{O}_3$ - $\text{In}_2\text{O}_3$  nanotube-based ethanol gas sensor with high sensitivity and excellent selectivity, *Applied Physics a-Materials Science & Processing*, 2017, **123**.
4. Y. Zhang, Z. Zheng and F. Yang, Highly Sensitive and Selective Alcohol Sensors based on Ag-Doped  $\text{In}_2\text{O}_3$  Coating, *Industrial & Engineering Chemistry Research*, 2010, **49**, 3539-3543.
